# Supplementary material for: Mechanisms behind bottom-up effects: eutrophication increases fecundity by shortening the interspawning interval in stickleback
Source: PeerJ. 2020 Jul 17;8:e9521. doi: 10.7717/peerj.9521 (PMC7370929; doi:10.7717/peerj.9521)
Supplement: Supplemental Information 1 [file peerj-08-9521-s001.xlsx]

## Sheet: Sheet1
Replicate	Treatment high or low algae density	Female SL mm	Female WW1 g	Days	Nr Clutches	Mean Interbreeding Interval days	Mean Clutch Size Nr	Mean Egg Size Diameter mm	Algae End g	ZooplanktonEnd/l	Bethos End g	Clutch 1 EggNr	Egg Size clutch 1 diameter mm	Female WW1 g	Interval 1 Days	Clutch 2 Nr	Egg Size 2 diameter mm	Female WW2 g	Interval 2 Days	Clutch 3 Nr	Egg Size 3 diameter mm	Female WW3 g	Interval 3 Days	Clutch 4 Nr	Egg Size 4 diameter mm	Female WW4 g	Interval 4 Days	Clutch 5 Nr	Egg Size 5 diameter mm	Female WW5 g	Interval 5 Days	Clutch 6 Nr	Egg Size 6 diameter mm	Female WW6 g	Interval 6 Days	Clutch 7 Nr	Egg Size 7 diameter mm	Female WW7 g
1	Low	50	1.9	48	3	15	128.667	1.77667	73.7	31	0.349333	129	1.78	1.9	13	124	1.76	1.7	17	133	1.79	1.65
2	Low	62	2.79	59	4	19.3333	146.5	1.89	61.4	13	0.707	151	1.89	2.79	15	168	1.9	2.65	20	146	1.89	2.46	23	121	1.88	2.27
3	Low	49	1.42	33	2	23	130.5	1.565	57.2	9	2.5285	121	1.58	1.42	23	140	1.55	1.41
4	Low	49	1.5	48	2	32	165	1.605	46.1	26	0.18	161	1.59	1.5	32	169	1.62	1.56
5	Low	56	2.34	57	4	15	168.75	1.975	71.9	14	0.316667	152	1.98	2.34	12	177	1.98	2.27	15	180	1.99	2.14	18	166	1.95	2.07
6	Low	59	1.95	80	4	17.3333	166.5	1.8075	58.4	15	0.1872	160	1.81	1.95	13	172	1.83	1.9	18	179	1.79	1.83	21	155	1.8	1.78
7	Low	62	2.8	48	4	14.3333	154	1.875	66.8	11	1.11933	144	1.88	2.8	13	159	1.86	2.75	14	167	1.86	2.76	16	146	1.9	2.77
8	Low	63	2.77	63	4	19.6667	184.5	1.895	79.3	5	0.286	179	1.89	2.77	15	190	1.89	2.6	21	196	1.9	2.53	23	173	1.9	2.35
9	Low	68	3.13	55	3	23.5	195.333	1.93667	55.1	16	0.175333	198	1.92	3.13	14	212	1.95	2.97	33	176	1.94	2.81
10	Low	55	1.79	63	4	18	120.75	1.7175	89	49	0.321	115	1.7	1.79	13	121	1.73	1.7	17	130	1.74	1.65	24	117	1.7	1.63
11	Low	56	2.23	70	5	13.75	159.2	1.728	54.5	26	1.042	160	1.73	2.23	12	168	1.73	2.15	12	174	1.74	2.03	13	164	1.73	1.95	18	130	1.71	1.89
12	Low	59	2.45	63	4	16.6667	113	1.78	93.4	23	2.2	118	1.79	2.45	14	110	1.78	2.3	17	122	1.77	2.11	19	102	1.78	2.03
13	Low	66	3.23	70	5	16	207.2	1.81	79.3	24	0.18	225	1.8	3.23	15	200	1.81	3.05	14	213	1.8	2.92	16	197	1.82	2.77	19	201	1.82	2.68
14	Low	60	2.44	68	3	25	164	1.71333	56.6	15	0.2	165	1.7	2.44	15	177	1.73	2.37	35	150	1.71	2.31
15	Low	45	1.67	80	2	25	113.5	1.605	89.5	52	0.163	116	1.6	1.67	25	111	1.61	1.64
16	Low	59	2.78	65	4	18.6667	145.5	1.7775	71.2	36	5.26	166	1.78	2.78	13	134	1.79	2.63	18	144	1.76	2.5	25	138	1.78	2.35
17	Low	57	1.87	58	3	21.5	147	1.71333	70	36	0.24	156	1.71	1.87	16	145	1.73	1.8	27	140	1.7	1.78
18	Low	65	2.56	69	4	18	186.5	1.77	57.1	24	0.127	193	1.75	2.56	14	183	1.77	2.45	17	180	1.78	2.4	23	190	1.78	2.37
19	Low	54	2.12	80	5	15	140.6	1.7	84.7	27	0.18	163	1.71	2.12	15	144	1.69	2.15	14	136	1.72	2.1	16	147	1.69	2.05	15	113	1.69	1.99
20	Low	55	1.88	56	4	16	135	1.7475	74.6	31	0.2	145	1.76	1.88	13	134	1.73	1.8	15	135	1.76	1.78	20	126	1.74	1.74
21	High	50	1.47	53	5	15	142	1.638	152.9	115	2.08	142	1.65	1.47	14	156	1.63	1.5	16	138	1.63	1.48	13	145	1.63	1.46	17	129	1.65	1.39
22	High	66	3.01	80	6	13.2	202.333	1.89167	165.2	23	0.72	202	1.89	3.01	13	222	1.91	3.1	12	230	1.87	2.97	12	188	1.9	2.8	15	191	1.88	2.8	14	181	1.9	2.75
23	High	63	2.66	72	7	10.8333	150.429	1.84714	140.5	163	7.78	151	1.85	2.66	10	170	1.84	2.6	12	162	1.86	2.57	10	151	1.84	2.55	12	169	1.84	2.54	10	136	1.85	2.55	11	114	1.85	2.48
24	High	61	2.47	61	3	21	177.333	1.81667	160.2	36	1.02	174	1.83	2.47	15	190	1.81	2.38	27	168	1.81	2.23
25	High	55	2.47	73	4	19.6667	178.25	1.77	186.2	39	6.84	180	1.77	2.47	12	164	1.77	2.42	19	178	1.78	2.44	28	191	1.76	2.37
26	High	53	2.03	70	4	19.3333	128.25	1.7875	171.8	129	0.6	129	1.79	2.03	13	135	1.8	2	19	140	1.78	2.01	26	109	1.78	1.92
27	High	55	1.79	67	6	12.6	120.167	1.64167	186.8	87	2.96	121	1.63	1.79	12	140	1.63	1.8	12	123	1.63	1.74	14	118	1.64	1.67	10	117	1.66	1.6	15	102	1.66	1.53
28	High	57	1.69	66	5	15.75	145.4	1.66	151.3	40	1.92	136	1.65	1.69	16	164	1.67	1.67	13	138	1.67	1.66	17	156	1.66	1.65	17	133	1.65	1.62
29	High	47	1.77	55	3	26.5	119	1.63	227.4	78	2.5	111	1.62	1.77	17	142	1.63	1.7	36	104	1.64	1.57
30	High	60	2.57	69	7	10.8333	172	1.81	176.6	60	6.502	188	1.83	2.57	9	175	1.81	2.56	12	199	1.81	2.5	10	194	1.82	2.5	13	186	1.81	2.48	10	164	1.79	2.49	11	98	1.8	2.44
31	High	57	2.24	64	5	13.75	131.4	1.798	203.4	41	0.66	128	1.82	2.24	12	141	1.82	2.25	13	131	1.79	2.2	14	133	1.78	2.12	16	124	1.78	2
32	High	55	1.7	65	5	14.5	124	1.702	161.7	136	1.32	124	1.7	1.7	15	124	1.74	1.73	13	124	1.72	1.68	14	124	1.68	1.66	16	124	1.67	1.66
33	High	52	2.02	48	4	15.6667	126.25	1.7975	215.1	87	4.24	125	1.78	2.02	16	143	1.8	2.05	16	117	1.79	1.97	15	120	1.82	1.89
34	High	62	2.64	66	4	17.3333	181.25	1.775	151.2	92	3.72	182	1.77	2.64	11	196	1.78	2.6	20	160	1.77	2.45	21	187	1.78	2.3
35	High	62	2.6	78	6	13.2	153.333	1.75667	170.4	92	2.58	159	1.75	2.6	12	167	1.76	2.58	14	144	1.74	2.55	15	170	1.76	2.43	13	150	1.76	2.4	12	130	1.77	2.31
36	High	61	2.82	40	4	13	153	1.7725	171.8	48	5.14	146	1.76	2.82	12	170	1.78	2.7	15	150	1.78	2.59	12	146	1.77	2.42
37	High	54	2.12	80	5	14.75	153.2	1.698	181.2	135	1.98	154	1.72	2.12	13	174	1.7	2.15	13	160	1.69	2.1	15	137	1.68	2.08	18	141	1.7	2.02
38	High	65	2.98	67	5	14	191.4	1.798	199.5	81	0.9	182	1.82	2.98	11	203	1.78	2.95	10	212	1.79	2.88	17	188	1.79	2.75	18	172	1.81	2.62
39	High	51	1.9	78	6	13.2	111.667	1.76333	177.3	46	3.28	106	1.78	1.9	10	123	1.75	1.95	13	120	1.75	1.94	11	124	1.77	1.9	15	103	1.77	1.9	17	94	1.76	1.89
40	High	56	2.05	73	5	15	123	1.844	168.6	52	1.5	123	1.83	2.05	11	145	1.85	2.14	13	138	1.86	2.1	16	119	1.85	2.01	20	90	1.83	1.97
